# Supplementary material for: Optical Genome Mapping as a Tool to Unveil New Molecular Findings in Hematological Patients with Complex Chromosomal Rearrangements
Source: MDPI journal article supplement (doi:10.3390/genes14122180), 2023-12-05
Supplement: s1 [file s1]

**Supplementary Figure S1. A.** M-FISH analysis of Case 1 showing a der(16) chromosome generated by the fusion of regions from chromosomes 5 and 16. **B.** FISH experiment with BAC probes showing the cohybridization of probes of chromosomes 5 and 7 on the der(16) chromosome. **C.** Reconstruction of the complex rearrangement revealed in Case 1 using data from the FISH analysis. **D-E.** FISH experiment on Case 2 with chromosome 12 BAC probes shows evidence of the two cellular clones bearing the derived chromosomes der(19) (D) and der(15) (E), respectively. **F.** Mapping of one of the fusion molecules showing the translocation t(8;11) in Case 2.

**Supplementary Table S1.** Summary of BAC probes used to characterize the complex rearrangement in Case 1.

|       | BAC clones   | Chromosomal band | Genomic position             | FISH pattern |
|-------|--------------|------------------|------------------------------|--------------|
| chr5  | RP11-978F19  | 5p15.31          | chr5:7,429,830-7,614,518     | 5, der(7p)   |
|       | RP11-956N20  | 5p15.31          | chr5:7,567,934-7,727,960     | 5, del       |
|       | RP11-719E22  | 5p15.1           | chr5:16984072-17,188,450     | 5, del       |
|       | RP11-1031A13 | 5p15.1           | chr5:17,146,132-17,325,568   | 5, der(16p)  |
|       | RP11-782C13  | 5p13.1           | chr5:41,063,958-41,230,605   | 5, der(16p)  |
|       | RP11-1149B6  | 5p11             | chr5:46235286-46384443       | 5, del       |
|       | RP11-1150B10 | 5q11.1           | chr5:49,406,372-49,441,108   | 5q, der(16q) |
|       | RP11-1115G10 | 5q21.1           | chr5:101398262-101,537004    | 5, der(16q)  |
|       | RP11-614O10  | 5q21.1           | chr5:101,670,005-101,860,287 | 5, del       |
|       | RP11-1141B16 | 5q22.3           | chr5:114,928,040-115,084,720 | 5, del       |
|       | RP11-844I6   | 5q22.3 - 5q23.1  | chr5:115,049,833-115,256,149 | 5, der(16p)  |
|       | RP11-587C14  | 5q23.2           | chr5:126,191,422-126,379,887 | 5, der(16p)  |
|       | RP11-959B16  | 5q23.2           | chr5:126,699,077-126,893,132 | 5, del       |
|       | RP11-759G10  | 5q32             | chr5:149,562,887-149,746,958 | 5, del       |
|       | RP11-802B10  | 5q32 - 5q33.1    | chr5:149,717,036-149,931,774 | 5, der(16p)  |
|       | RP11-641M21  | 5q35.3           | chr5:178,525,062-178,697,496 | 5, der(16p)  |
|       | 5q tel       |                  |                              | 5, del       |
| chr7  | 7p tel       |                  |                              | 7, del       |
|       | RP11-1145K16 | 7p21.3           | chr7:11,526,052-11,672,952   | 7, del       |
|       | RP11-1144D11 | 7p21.3           | chr7:11,670,288-11,817,250   | 7, der(16p)  |
|       | RP11-977N13  | 7p14.3           | chr7:29,586,414-29,769,237   | 7, der(16p)  |
|       | RP11-598L6   | 7p14.3           | chr7:29,718,289-29,895,592   | 7, del       |
|       | RP11-746I21  | 7p14.1           | chr7:41,148,107-41,344,937   | 7, del       |
|       | RP11-727A18  | 7p14.1           | chr7:41,184,324-41,388,108   | 7, der(7p)   |
| chr16 | 16p tel      |                  |                              | 16, der(16p) |

|              |                   |                                    |              |
|--------------|-------------------|------------------------------------|--------------|
| RP11-939O16  | 16p12.2 - 16p12.1 | chr16:24,176,728-<br>24,357,883    | 16, der(16p) |
| RP11-933O5   | 16p12.1           | chrchr16:24,368,841-<br>24,578,797 | 16, del      |
| RP11-909K3   | 16p11.2           | chr16:31,806,425-<br>31,985,101    | 16, del      |
| RP11-1150K14 | 16p11.2           | chr16:32,364,962-<br>32,506,561    | 16, der(16p) |
| RP11-777K14  | 16q23.2           | chr16:80,674,625-<br>80,832,156    | 16, der(16p) |
| RP11-1146K12 | 16q23.3           | chr16:80,833,396-<br>80,985,646    | 16, del      |
| RP11-974F1   | 16q23.3           | chr16:83,935,212-<br>84,116,746    | 16, der(16q) |
| RP11-683J18  | 16q23.3-16q24.1   | chr16:84116845-84273389            | 16, der(16q) |

**Supplementary Table S2.** Summary of BAC clones used for FISH characterization in Case 2. Clones used to carry out FISH experiments to verify rearrangements identified later with the OGM analysis are indicated in bold. \*: BAC clone identifying breakpoint position of t(8;11) rearrangement.

| BAC clones      | Chromosomal<br>band | Genomic position                        | FISH pattern<br>Clone 1 | FISH<br>pattern<br>Clone 2 |
|-----------------|---------------------|-----------------------------------------|-------------------------|----------------------------|
| <b>chr3</b>     |                     |                                         |                         |                            |
| RP11-697A9      | 3q27.3              | chr3:187,092,897-<br>187,269,787        | 3+der(3)                | 3+der(3)                   |
| RP11-632M13     | 3q27.3              | chr3:187,409,272-<br>187,559,392 (BCL6) | 3+der(3)+der(14)        | 3+der(3)+der(14)           |
| <b>chr14</b>    |                     |                                         |                         |                            |
| RP11-1145H5     | 14q32.33            | chr14:106,995,083-<br>107,135,809       | 14+der(14)              | 14+der(14)                 |
| WI2-1337E13     | 14q32.33            | chr14:107,241,651-<br>107,280,235       | 14+der(3)               | 14+der(3)                  |
| <b>chr8</b>     |                     |                                         |                         |                            |
| RP11-838K18 (*) | 8q23.1              | chr8:106,650,156-<br>106,820,511        | 8+der(8)                | 8+der(8)                   |
| RP11-624K22     | 8q23.1              | chr8:106,648,457-<br>106,833,333        | 8+der(8)                | 8+der(8)                   |
| RP11-815K2      | 8q24.13             | chr8:123,010,127-<br>123,277,677        | 8+der(8)                | 8+der(8)                   |
| RP11-599F24     | 8q24.13             | chr8:123,231,330-<br>123,433,798        | 8+delete                | 8+deleto                   |
| RP11-737L24     | 8q24.21             | chr8:128,020,102-<br>128,166,538        | 8+delete                | 8+deleto                   |
| RP11-828N16     | 8q24.21             | chr8:128,171,158-<br>128,363,301        | 8+der(15)               | 8+der(15)                  |

|              |         |                               |                   |                   |
|--------------|---------|-------------------------------|-------------------|-------------------|
| RP11-1150B6  | 8q24.21 | chr8:128,385,200-128,551,221  | 8+der(15)         | 8+der(15)         |
| <b>chr11</b> |         |                               |                   |                   |
| RP11-843H2   | 11q22.3 | chr11:109,706,416-109,928,022 | 11+der(11)+der(8) | 11+der(11)+der(8) |
| RP11-1077G24 | 11q25   | chr11:134,623,632-134,819,369 | 11+der(11)+der(8) | 11+der(11)+der(8) |
| <b>chr15</b> |         |                               |                   |                   |
| RP11-1122B21 | 15q26.3 | chr15:102,198,592-102,321,240 | 15+der(15)        | 15+der(15)        |
| <b>chr19</b> |         |                               |                   |                   |
| RP11-878J15  | 19p13.3 | chr19:959,520-1,144,508       | 19+19             | 19+der(19)        |
| <b>chr12</b> |         |                               |                   |                   |
| RP11-879C9   | 12q14.2 | chr12:63,897,420-64,084,834   | 12+12             | 12+12             |
| RP11-1145M7  | 12q14.2 | chr12:64,082,607-64,246,165   | 12+12+der(15)     | 12+12             |
| RP11-778M9   | 12q14.3 | chr12:67,347,831-67,518,367   | 12+12+der(15)     | 12+12             |
| RP11-947M18  | 12q14.3 | chr12:67,419,690-67,607,491   | 12+12+der(15)     | 12+12+der(19)     |
| RP11-1083K9  | 12q21.2 | chr12:79,307,391-79,484,271   | 12+12+der(15)     | 12+12+der(19)     |

**Supplementary Table S3.** Report on the OGM analysis metrics of the two analyzed patients.

| Label                             | Value Case 1                   | Value Case 2                   | Description                                                         |
|-----------------------------------|--------------------------------|--------------------------------|---------------------------------------------------------------------|
| Reference                         | hg19_DLE1_0kb_0l<br>abels.cmap | hg19_DLE1_0kb_0l<br>abels.cmap | Name of the reference genome this sample was aligned to.            |
| Reference Length                  | 3,095,677,412 bp               | 3,095,677,412 bp               | Total length of reference sequence                                  |
| Enzyme                            | DLE-1                          | DLE-1                          | Name of the enzyme used in this sample.                             |
| Site                              | CTTAAG                         | CTTAAG                         | Recognition sequence of the enzyme used.                            |
| N50 (>= 20 kbp)                   | 510.49 kbp                     | 116.63 kbp                     | N50 of the molecules that are 20kbp or longer)                      |
| Total DNA (>= 20kbp)              | 509.97 Gbp                     | 4,140.12 Gbp                   | Total amount of DNA from molecules that are 20 kbp or longer        |
| N50 (>= 150kbp)                   | 510.49 kbp                     | 244.5 kbp                      | N50 of DNA molecules that are 150kbp or longer                      |
| Total DNA (>= 150kbp)             | 509.97 Gbp                     | 1,626.28 Gbp                   | Total amount of DNA from molecules that are 150kbp or longer        |
| N50 (>= 150kbp and min sites >=9) | 511.99 kbp                     | 246 kbp                        | Same as other N50 fields, but molecules must have at least 9 labels |

|                                                   |               |               |                                                                                             |
|---------------------------------------------------|---------------|---------------|---------------------------------------------------------------------------------------------|
| Total DNA ( $\geq$ 150kbp and min sites $\geq$ 9) | 498.13 Gbp    | 1,577.77 Gbp  | Same as other Total DNA fields, but molecules must have at least 9 labels                   |
| Map rate                                          | 97 %          | 75.1 %        | Percentage of molecules that are 150kbp or longer mapped to the reference                   |
| Effective coverage                                | 156.09        | 382.76        | Total amount of aligned DNA divided by the size of the reference genome times the map rate. |
| Average label density ( $\geq$ 150kbp)            | 15.91 /100kbp | 14.37 /100kbp | Average number of labels per 100 kbp for the molecules that are 150kbp or longer            |
| Negative label variance (NLV)                     | 6.36          | 15.25         | Percentage of reference labels absent in molecules                                          |
| Positive label variance (PLV)                     | 2.48          | 2.51          | Percentage of labels absent in reference                                                    |

**Supplementary Table S4.** Summary of alterations observed in Case 1.

| # RVA - SV pipeline calls - translocation_intrachr/interchr |              |             |            |            |             |      |  | Putative GeneFusion |
|-------------------------------------------------------------|--------------|-------------|------------|------------|-------------|------|--|---------------------|
| RefcontigID1                                                | RefcontigID2 | RefStartPos | RefEndPos  | Confidence | Orientation | VAF  |  |                     |
| 5                                                           | 7            | 7570048     | 40447112   | 0.76       | +/+         | 0.48 |  | ADCY2-SUGCT         |
| 5                                                           | 5            | 20956715    | 115067807  | 1.0        | -/+         | 0.45 |  | -                   |
| 5                                                           | 5            | 17200614    | 178558025  | 1.0        | +/+         | 0.62 |  | LOC285696-ADAMTS2   |
| 5                                                           | 7            | 20441058    | 11730728   | 1.0        | +/+         | 0.44 |  | -                   |
| 5                                                           | 7            | 126368328   | 29748602   | 1.0        | +/-         | 0.42 |  | -                   |
| 5                                                           | 16           | 149777716   | 24328644   | 0.99       | +/+         | 0.5  |  | TCOF1-CACNG3        |
| 5                                                           | 16           | 41138792    | 80766715   | 1.0        | +/-         | 0.42 |  | -                   |
| 5                                                           | 16           | 101467515   | 84090545   | 1.0        | +/+         | 0.48 |  | -                   |
| # CNV pipeline calls                                        |              |             |            |            |             |      |  |                     |
| Chromosome                                                  | Start        | End         | Width (MB) | Type       | CopyNumber  | VAF  |  |                     |
| 5                                                           | 19314        | 2573599     | 2,55       | gain       | 2           |      |  | 0,08                |
| 5                                                           | 7570048      | 17202500    | 9,63       | loss       | 1           |      |  | 0,45                |
| 5                                                           | 20441058     | 20961572    | 0,52       | loss       | 1           |      |  | 0,46                |
| 5                                                           | 41138792     | 46387213    | 5,25       | loss       | 1           |      |  | 0,43                |
| 5                                                           | 69017825     | 70304873    | 1,29       | loss       | 1           |      |  | 0,31                |
| 5                                                           | 101467515    | 115053027   | 13,59      | loss       | 1           |      |  | 0,46                |
| 5                                                           | 126368328    | 149798080   | 23,42      | loss       | 1           |      |  | 0,43                |
| 5                                                           | 178558025    | 180550860   | 1,99       | loss       | 1           |      |  | 0,39                |

|    |           |           |       |      |   |      |
|----|-----------|-----------|-------|------|---|------|
| 7  | 10487     | 11756933  | 11,73 | loss | 1 | 0,46 |
| 7  | 29741974  | 40442426  | 10,7  | loss | 1 | 0,44 |
| 7  | 61728588  | 62411082  | 0,68  | loss | 1 | 0,31 |
| 7  | 99928050  | 102067557 | 2,14  | gain | 2 | 0,08 |
| 7  | 157426955 | 158398683 | 0,97  | loss | 1 | 0,26 |
| 16 | 1194703   | 2030546   | 0,84  | gain | 2 | 0,2  |
| 16 | 17946804  | 18730075  | 0,78  | gain | 2 | 0,11 |
| 16 | 24328644  | 33813209  | 9,48  | loss | 1 | 0,43 |
| 16 | 80726498  | 84069287  | 3,34  | loss | 1 | 0,45 |
| 16 | 84594335  | 89400501  | 4,38  | loss | 1 | 0,55 |

**Supplementary Table S5.** List of SVs observed in Case 2 resulting from the release of the masking filter of repeated regions and putative fusion genes generated. SVs already detected with standard techniques are indicated in bold.

| RefcontigI<br>D1 | RefcontigI<br>D2 | RefStartP<br>os        | RefEndP<br>os          | Type                                                | VA<br>F     | PutativeGeneFusion     |
|------------------|------------------|------------------------|------------------------|-----------------------------------------------------|-------------|------------------------|
| 1                | 16               | 146305863<br>.0        | 70855669.<br>0         | trans_interchr_com<br>mon                           | 0.61        | LOC100288142-<br>HYDIN |
| 1                | 16               | 146305863<br>.0        | 70855669.<br>0         | trans_interchr_com<br>mon                           | 0.61        | LOC100288142-<br>HYDIN |
| 1                | 4                | 142729351<br>.0        | 49323558.<br>0         | trans_interchr_com<br>mon                           | 0.55        | -                      |
| 1                | 2                | 149015459<br>.0        | 91915456.<br>0         | trans_interchr_com<br>mon                           | 0.39        | -                      |
| 1                | 1                | 120931921<br>.0        | 149459218<br>.0        | trans_intrachr_com<br>mon                           | 0.32        | -                      |
| 1                | 1                | 120931921<br>.0        | 149798528<br>.0        | trans_intrachr_com<br>mon                           | 0.5         | -                      |
| 1                | 1                | 120931921<br>.0        | 149798528<br>.0        | trans_intrachr_com<br>mon                           | 0.5         | -                      |
| 1                | 1                | 143886051<br>.0        | 206077412<br>.0        | trans_intrachr_com<br>mon                           | 0.32        | -                      |
| 3                | 14               | <b>187464477</b><br>.0 | <b>106295617</b><br>.0 | <b>translocation_interc</b><br><b>hr</b>            | <b>0.17</b> | -                      |
| 5                | 19               | 180788315<br>.0        | 163173.0               | trans_interchr_com<br>mon                           | 0.01        | -                      |
| 6                | 6                | 101576997<br>.0        | 157551891<br>.0        | translocation_intrac<br>hr                          | 0.35        | -                      |
| 6                | 6                | 74568071.<br>0         | 113035506<br>.0        | translocation_intrac<br>hr                          | 0.05        | -                      |
| 7                | 19               | 10487.0                | 248092.0               | trans_interchr_com<br>mon                           | 0.05        | -                      |
| 7                | 16               | 65523.0                | 90192279.<br>0         | trans_interchr_com<br>mon                           | 0.01        | -                      |
| 8                | 15               | <b>128219996</b><br>.0 | <b>102516712</b><br>.0 | <b>trans_interchr_seg</b><br><b>d</b><br><b>upe</b> | <b>0.04</b> | <b>CCAT1-WASH3P</b>    |
| 8                | 11               | <b>106772876</b><br>.0 | <b>109807959</b><br>.0 | <b>translocation_interc</b><br><b>hr</b>            | <b>0.05</b> | -                      |
| 9                | 16               | 141148935<br>.0        | 90186687.<br>0         | trans_interchr_com<br>mon                           | 0.21        | -                      |

|    |    |           |           |                    |      |              |
|----|----|-----------|-----------|--------------------|------|--------------|
|    |    | 141150069 |           | trans_interchr_com |      |              |
| 9  | 11 | .0        | 177912.0  | mon                | 0.23 | -            |
|    |    | 141150069 |           | trans_interchr_com |      |              |
| 9  | 19 | .0        | 244645.0  | mon                | 0.15 | -            |
|    |    | 46425257. | 51764626. | trans_intrachr_seg |      |              |
| 10 | 10 | 0         | 0         | upe                | 0.17 | -            |
|    |    |           | 102401582 | trans_interchr_com |      |              |
| 11 | 15 | 73015.0   | .5        | mon                | 0.13 | -            |
|    |    |           |           | trans_intrachr_com |      |              |
| Y  | Y  | 9341795.0 | 9171732.0 | mon                | 0.48 | TTY20-TSPY3  |
|    |    |           |           |                    |      | TTY20-       |
|    |    |           |           | trans_intrachr_com |      | FAM197Y2;TTY |
| Y  | Y  | 9362122.0 | 9171732.0 | mon                | 0.48 | 20-TSPY3     |
|    |    |           |           |                    |      | TTY20-       |
|    |    |           |           | trans_intrachr_com |      | FAM197Y2;TTY |
| Y  | Y  | 9362122.0 | 9171732.0 | mon                | 0.48 | 20-TSPY3     |
|    |    |           |           | trans_intrachr_com |      |              |
| Y  | Y  | 9371799.0 | 9298299.0 | mon                | 0.25 | -            |
|    |    |           |           | trans_intrachr_com |      |              |
| Y  | Y  | 9371799.0 | 9298299.0 | mon                | 0.25 | -            |
